# Supplementary material
Source: PubMed Central journal article supplement (PMC8893931)
Supplement: mmc1.pdf [file mmc1.pdf]

**164** hospitalized SARS-CoV-2 positive patients  
November 20, 2020 to March 31, 2020

- 91** Excluded
  - 11** End-stage renal failure
  - 17** Active malignancy
  - 10** Previous/current autoimmune disease
  - 31** Unable to obtain the informed consent form
  - 22** Declined to provide the informed consent form

**73** hospitalized SARS-CoV-2 patients

**55/73** Discharged (75.3%)

**18/73** Death (24.7%)

**3/55** Lost to follow-up (5.5%)

**52** Complete follow-up (94.6%)
