# Supplementary material
Source: PubMed Central journal article supplement (PMC8893931)

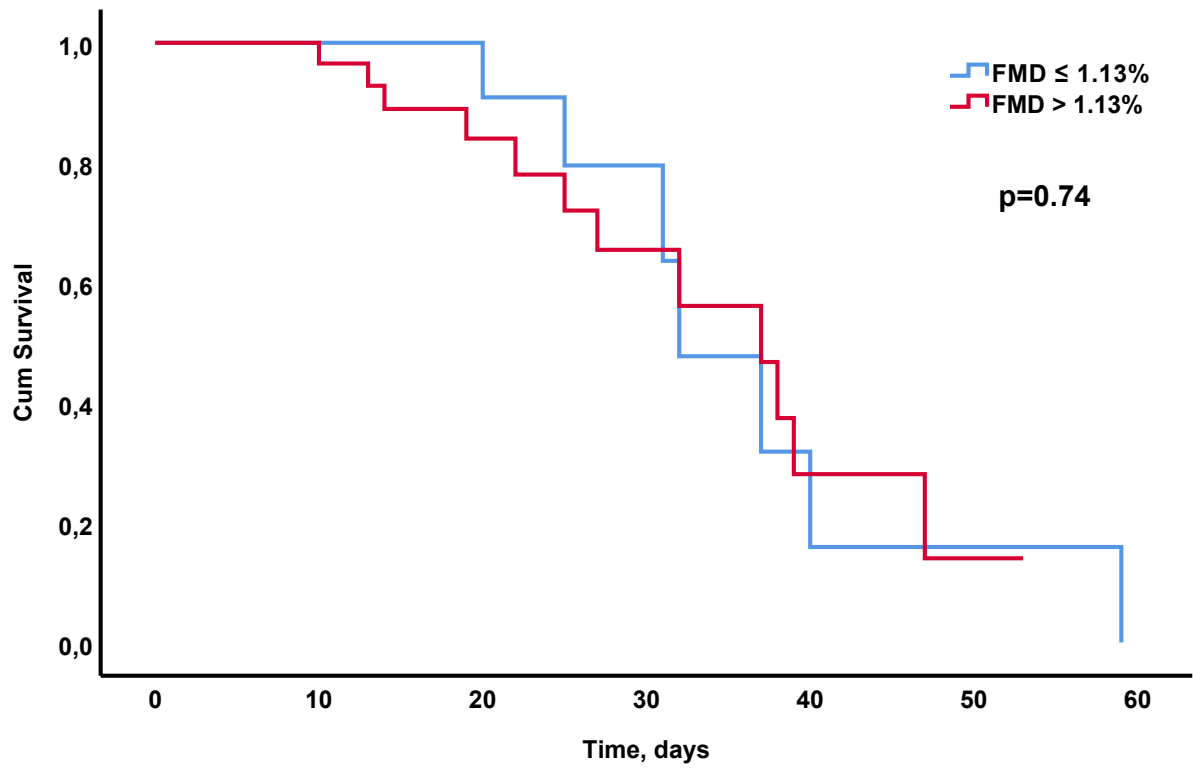

Supplement: mmc2.pdf [file mmc2.pdf]

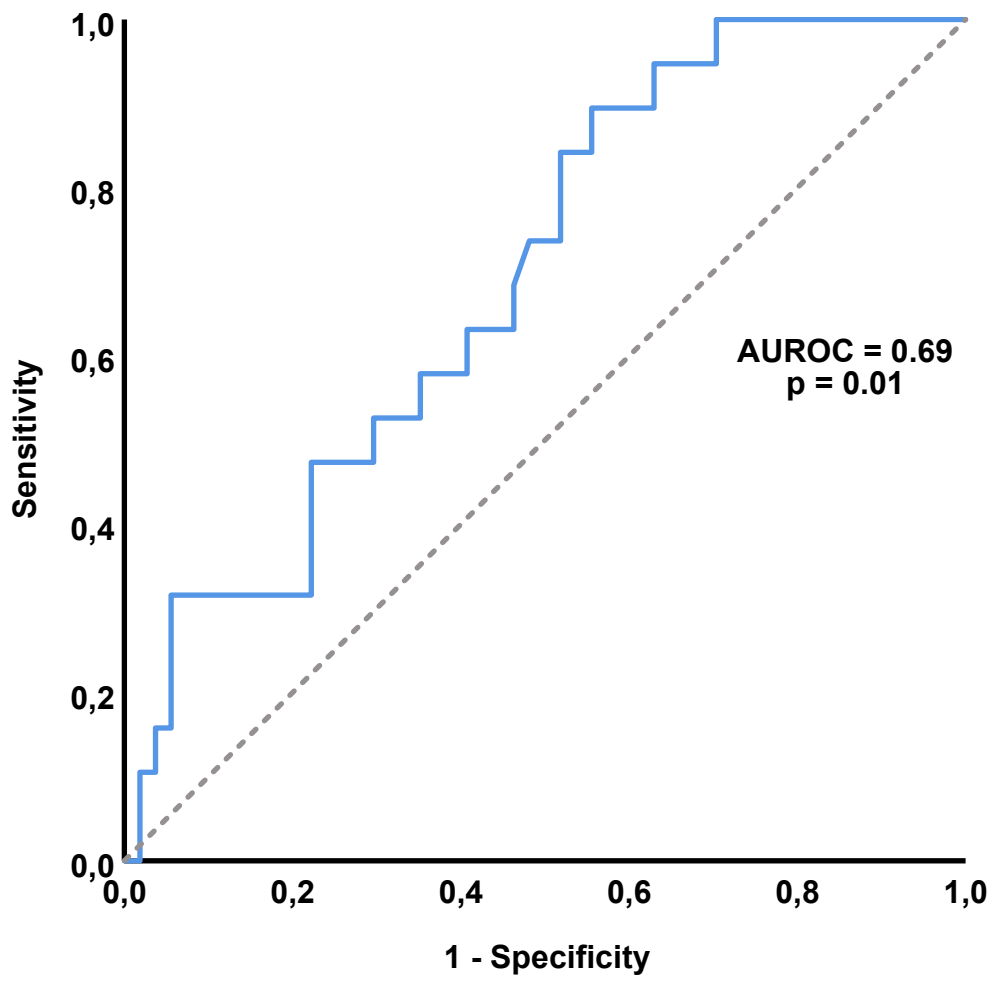

Supplement: mmc3.pdf [file mmc3.pdf]

# Repeated measures ANOVA

$p_{\text{for interaction}}=0.22$

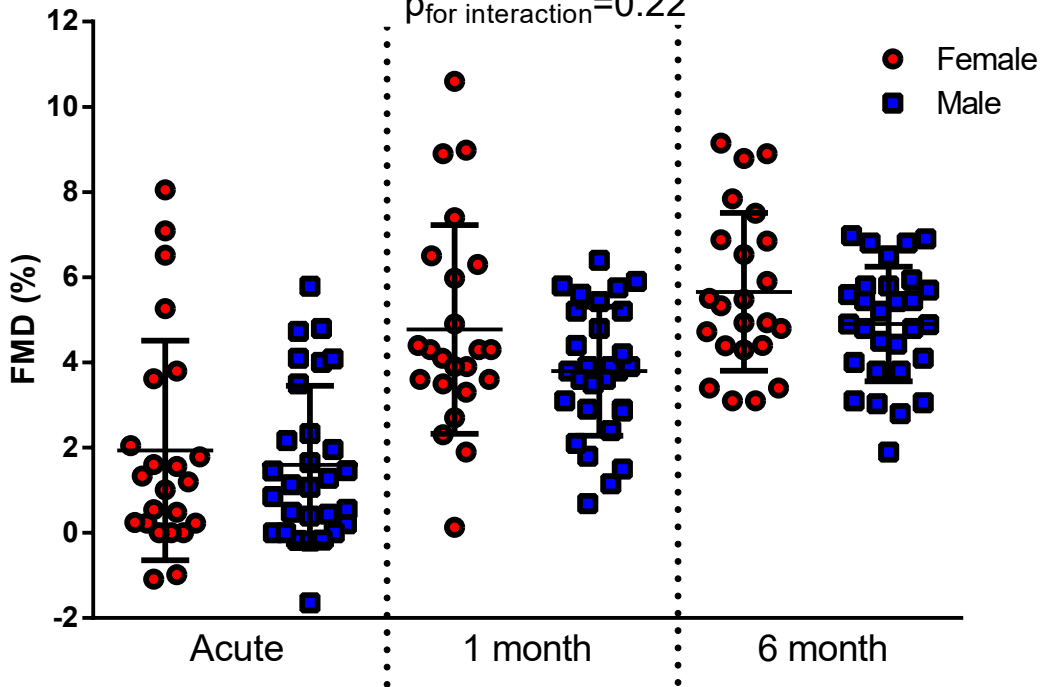

Supplement: mmc4.pdf [file mmc4.pdf]

# Repeated measures ANOVA

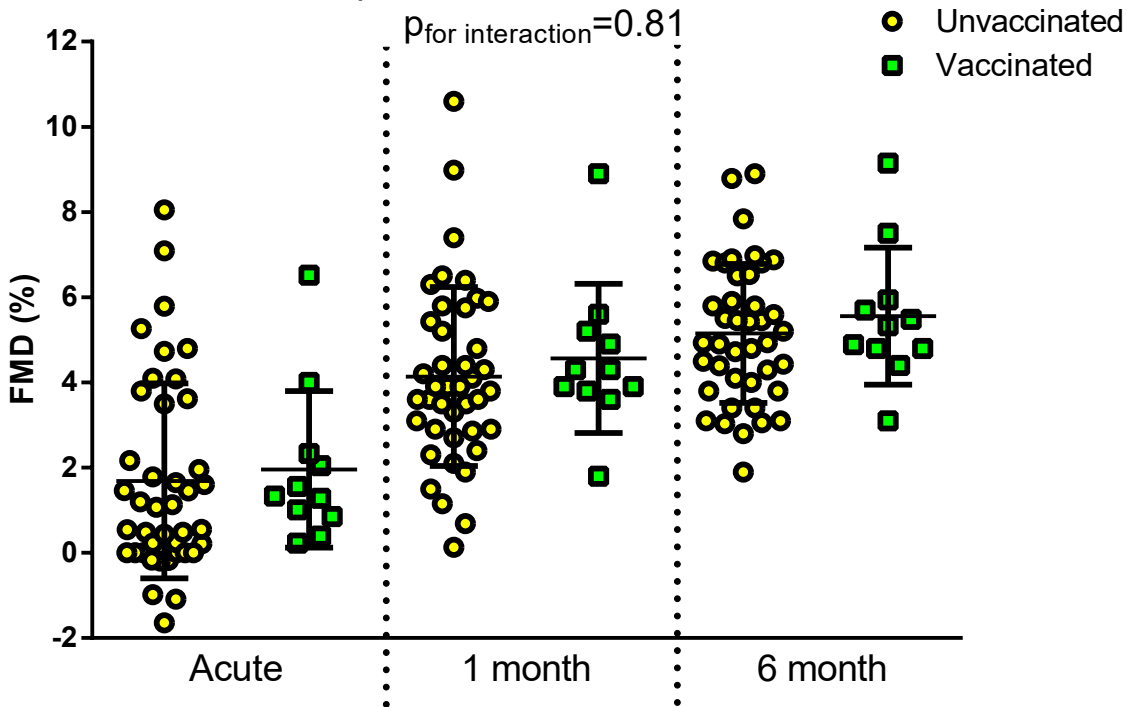

Supplement: mmc5.pdf [file mmc5.pdf]
